# Supplementary material for: 3D printed heterogeneous hybrid hydrogel scaffolds for sequential tumor photothermal-chemotherapy and wound healing
Source: Royal Society of Chemistry journal article supplement (doi:10.1039/d2bm00903j), 2022-01-01
Supplement: d2bm00903j2.pdf [file d2bm00903j2.pdf]

## **Supporting Information:**

### **3D printed heterogeneous hybrid hydrogel scaffolds for sequential tumor photothermo-chemo therapy and wound healing**

*Langtao Xu<sup>1</sup>, You Chen<sup>1</sup>, Peng Zhang, Junjie Tang, Yifan Xue, Hongsheng Luo, Rui Dai, Jinlong*

*Jin, Jie Liu\**

*School of Biomedical Engineering, Sun Yat-sen University, Guangzhou, Guangdong, 510006,*

*China*

*<sup>1</sup>LT. X and Y. Chen contributed equally to this work.*

#### **\* Corresponding Authors:**

Prof. Jie Liu

Email: [liujie56@mail.sysu.edu.cn](mailto:liujie56@mail.sysu.edu.cn)

Table.S1. The gel-sol transform temperature of composite thermosensitive hydrogel

| Gelatin(m/v) | GG(m/v) | gel-sol transform temperature (°C) |
|--------------|---------|------------------------------------|
| 10%          | 0.1%    | 36                                 |
| 10%          | 0.2%    | 40                                 |
| 10%          | 0.3%    | 45                                 |
| 15%          | 0.1%    | 38                                 |
| 15%          | 0.2%    | 42                                 |
| 15%          | 0.3%    | 48                                 |

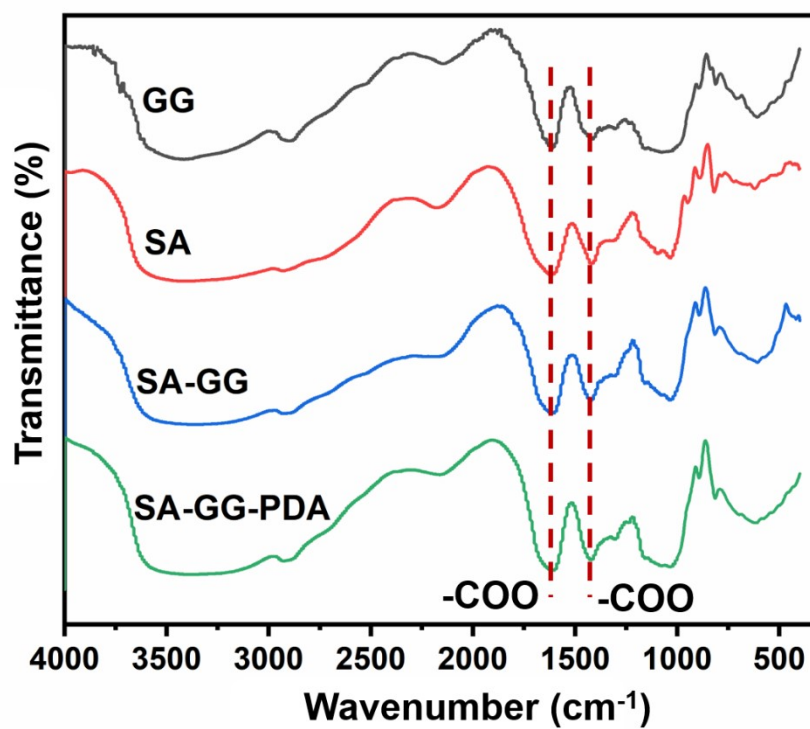

**Figure.S1** The FTIR spectrum of GG, SA SA-GG and SA-GG@PDA powder showed that there was no interaction between the SA GG and PDA, but only a physical mixing process.

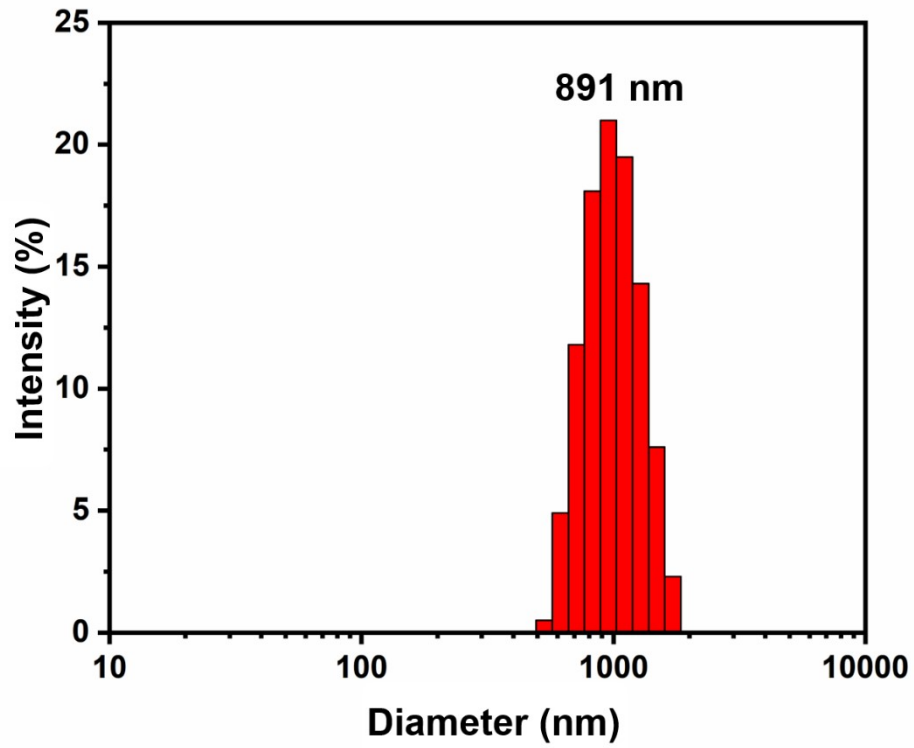

1

Figure.S2 The size distribution of PDA nanoparticles.

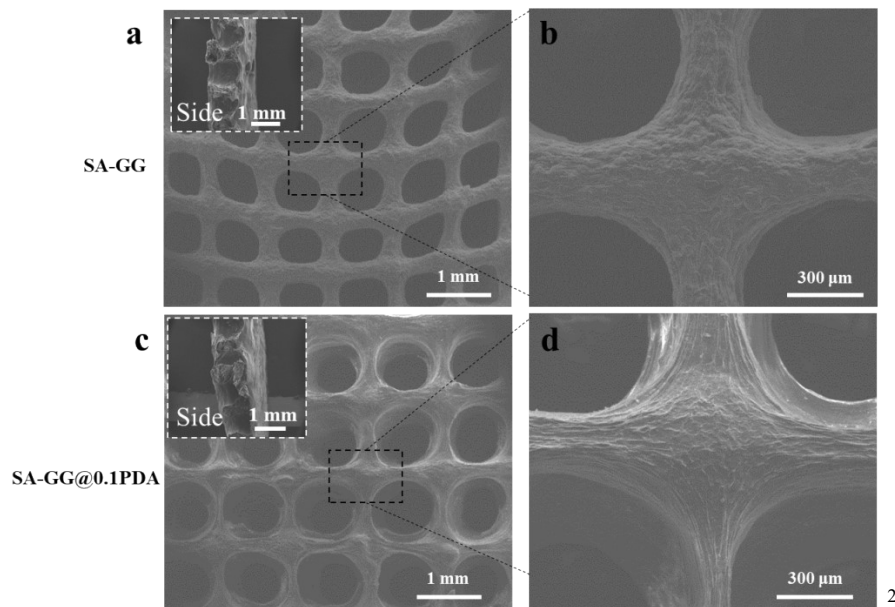

2

Figure.S3 The SEM results of the morphologies of the 3D printed SA-GG (a, b) and SA-GG@0.1PDA (c, d) scaffolds.

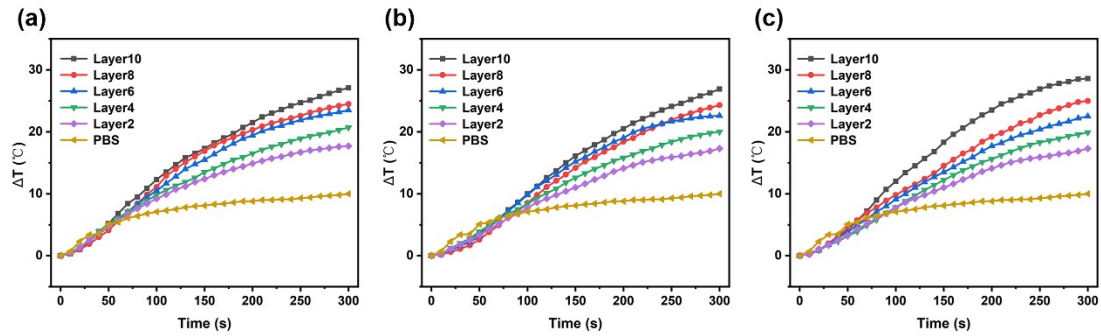

**Figure.S4** The temperature curve of SA-GG@0.1PDA (a), SA-GG@0.3PDA (b), SA-GG@0.5PDA (c) hydrogel scaffolds, immersed in 300  $\mu\text{L}$  of deionized water, under NIR irradiation at a power density of  $1.5 \text{ W/cm}^2$ , respectively ( $n = 1$ ).

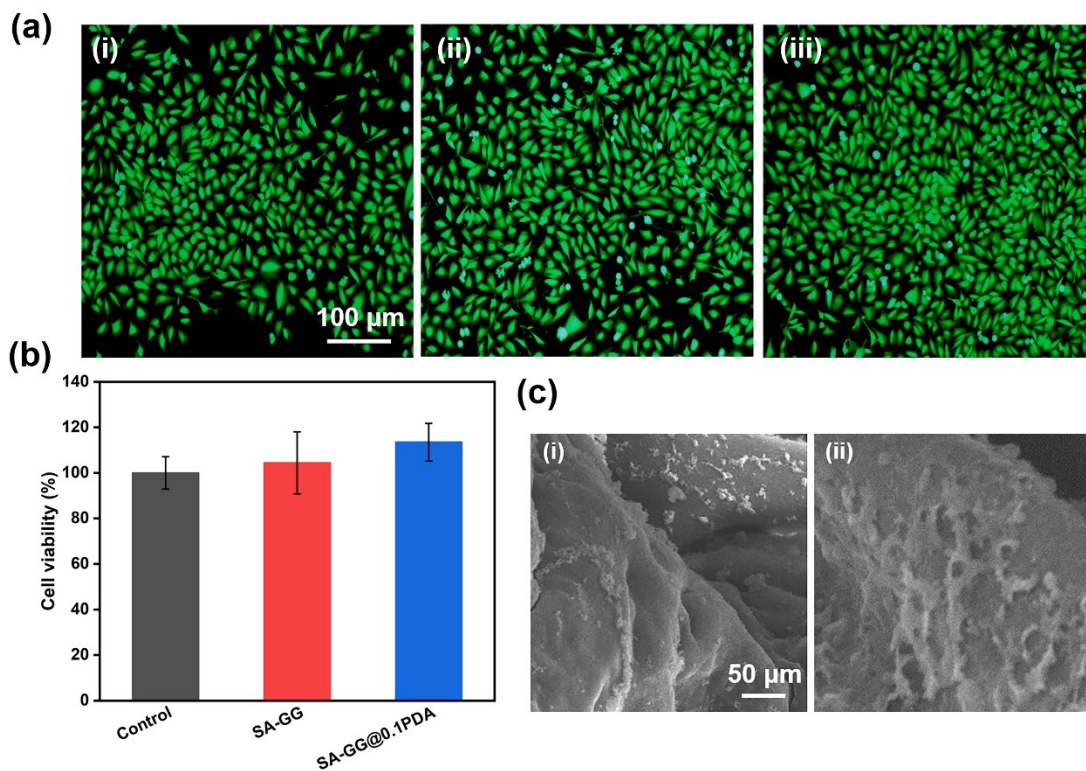

**Figure.S5** (a) Live/dead assay of HUVECs incubation with (i) DMEM, (ii) SA-GG and (iii) SA-GG@PDA scaffolds. (b) The viability of HUVECs cells. (C) SEM images of HUVECs adhere on (i)SA-GG and (ii) SA-GG@PDA hydrogel scaffolds.

### Video.S1

The printing process of the fabrication of large and complex 3D construct by using the SA-GG@0.1PDA bioink.
